# Supplementary material
Source: PubMed Central journal article supplement (PMC2946789)

Type of file: figure

Label: Figure S1

Filename: BrunneS1.jpg

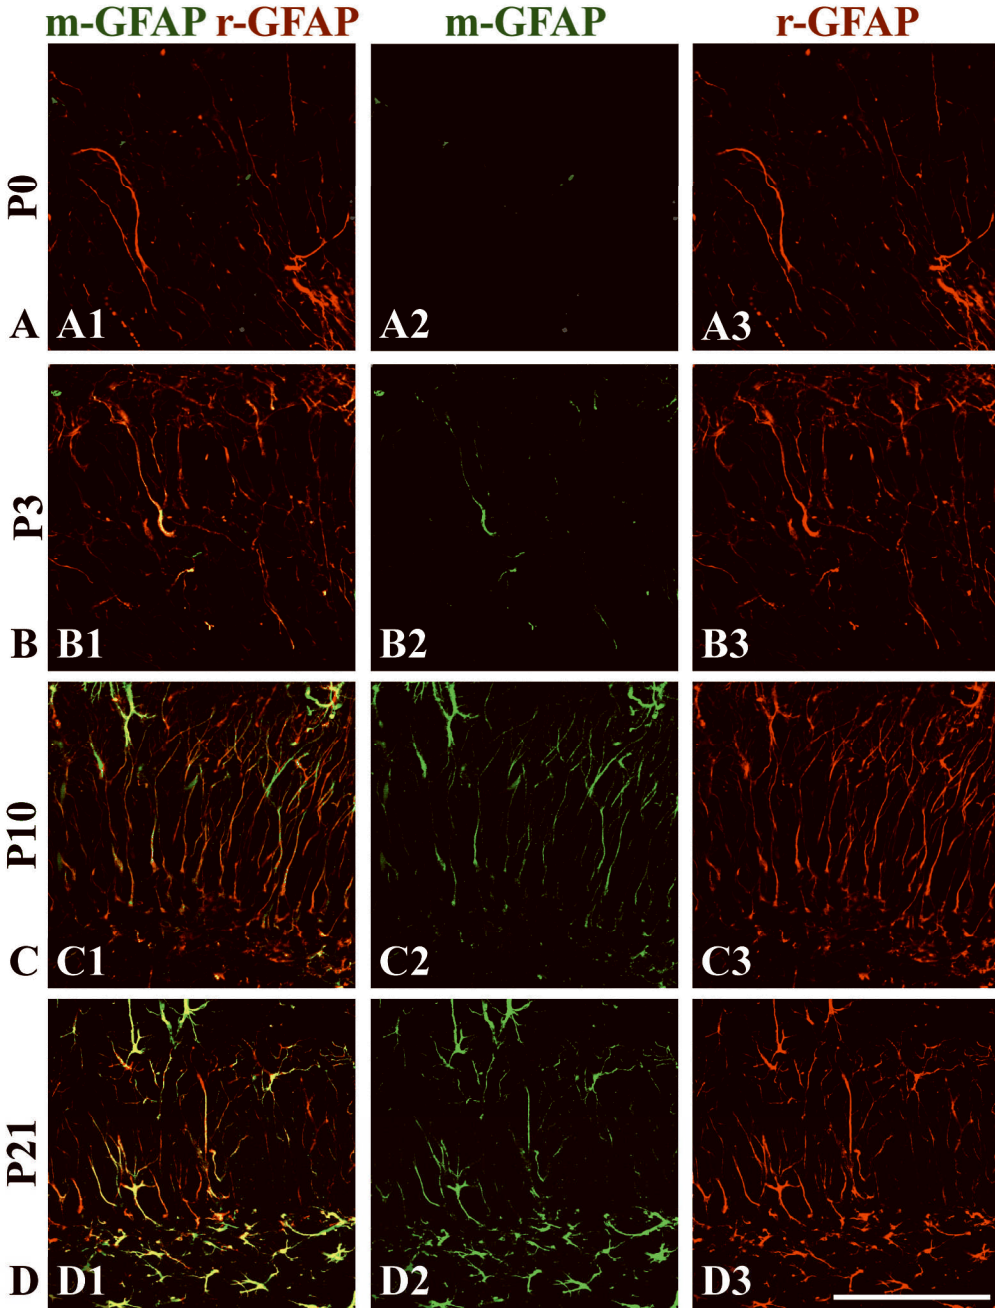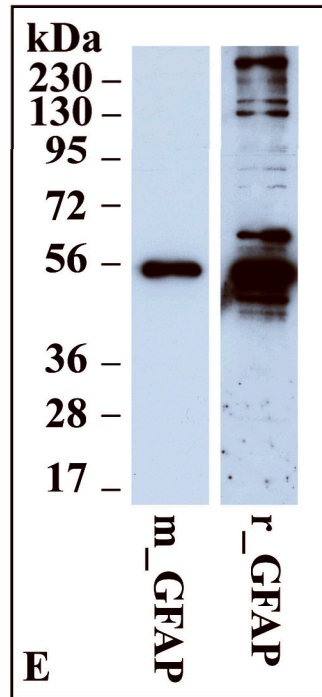

Type of file: figure

Label: Figure S2

Filename: BrunneS2.jpg

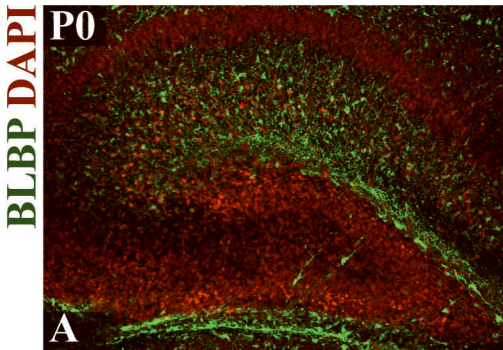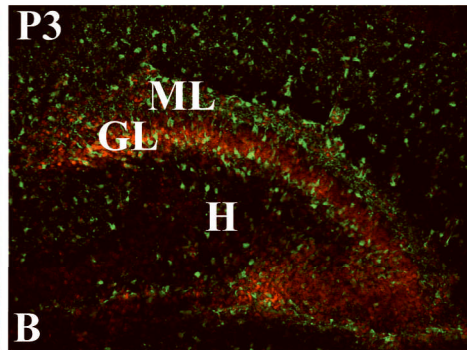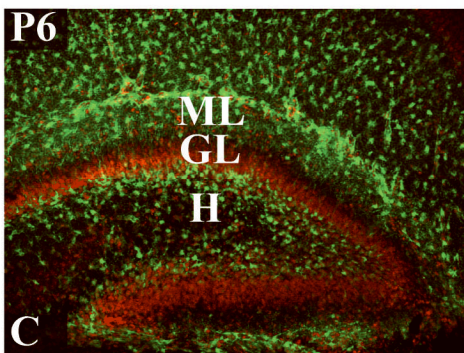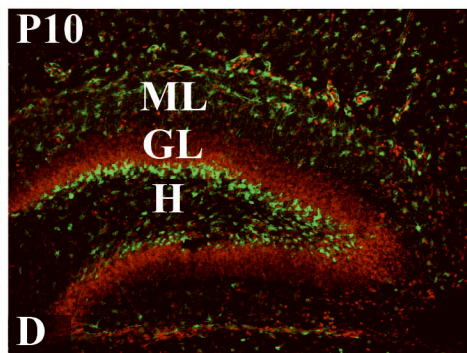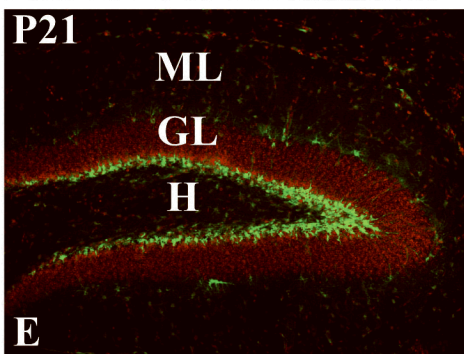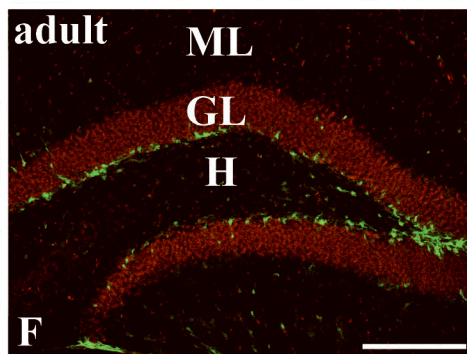

Type of file: figure

Label: Figure S3

Filename: BrunneS3.jpg

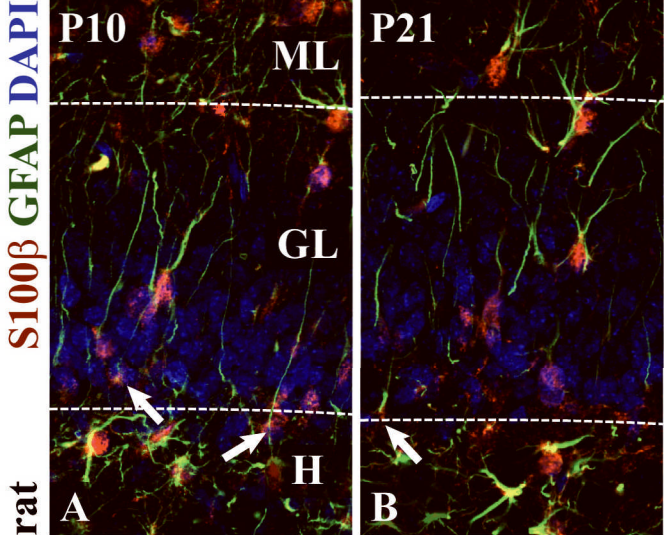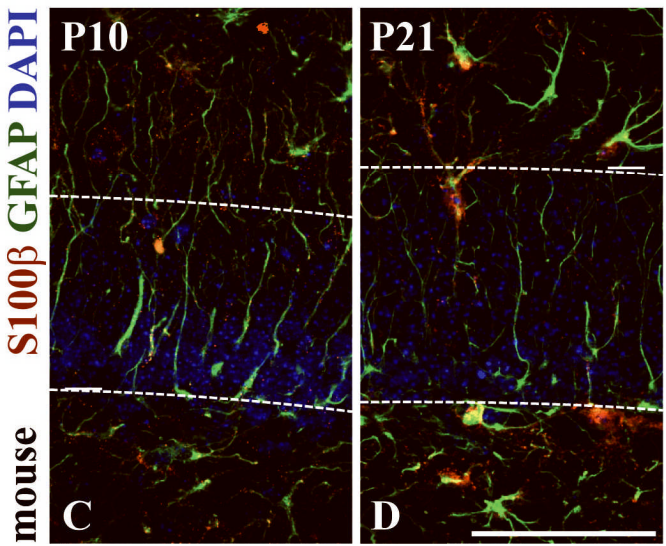

Type of file: figure

Label: Figure S4

Filename: BrunneS4.jpg

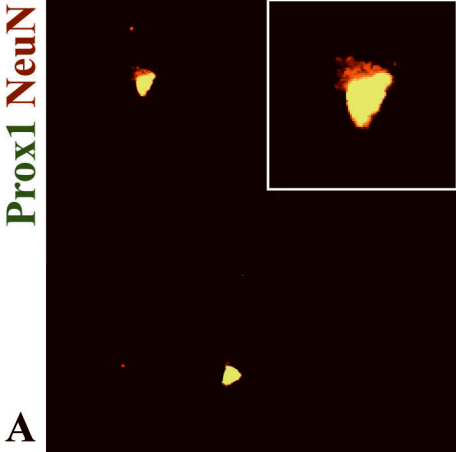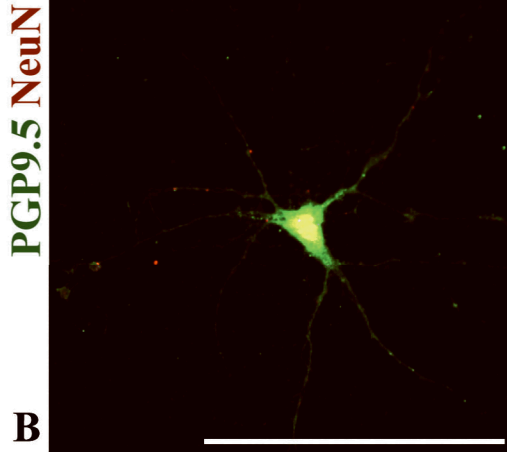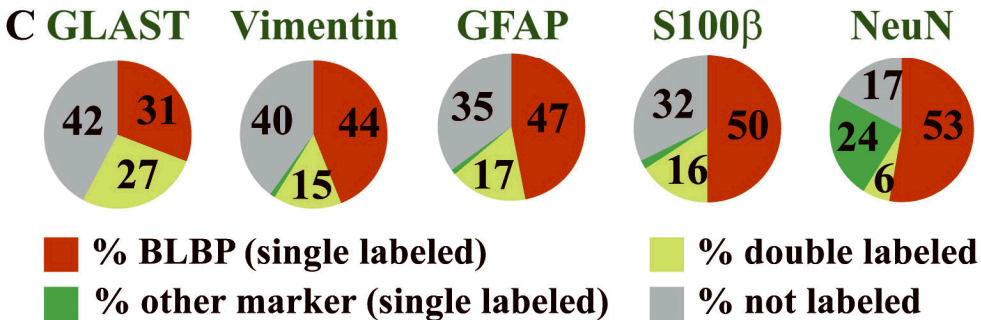



Type of file: figure

Label: Figure S5

Filename: BrunneS5.jpg

**BLBP GFAP**

**P21 3D**

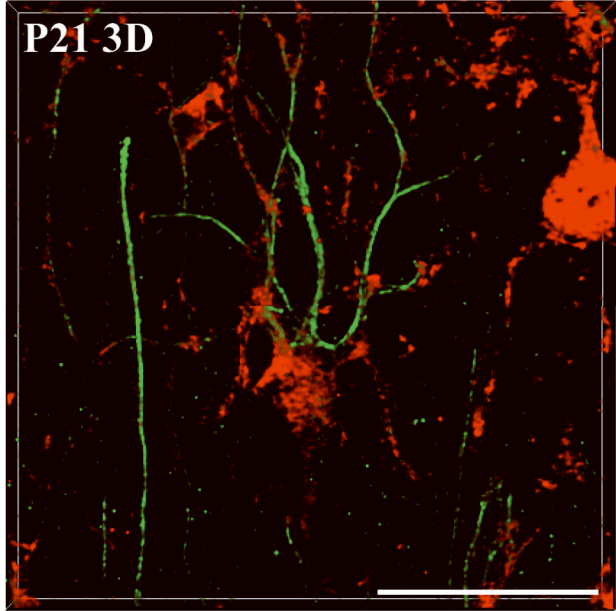

Type of file: figure

Label: Figure S6

Filename: BrunneS6.jpg

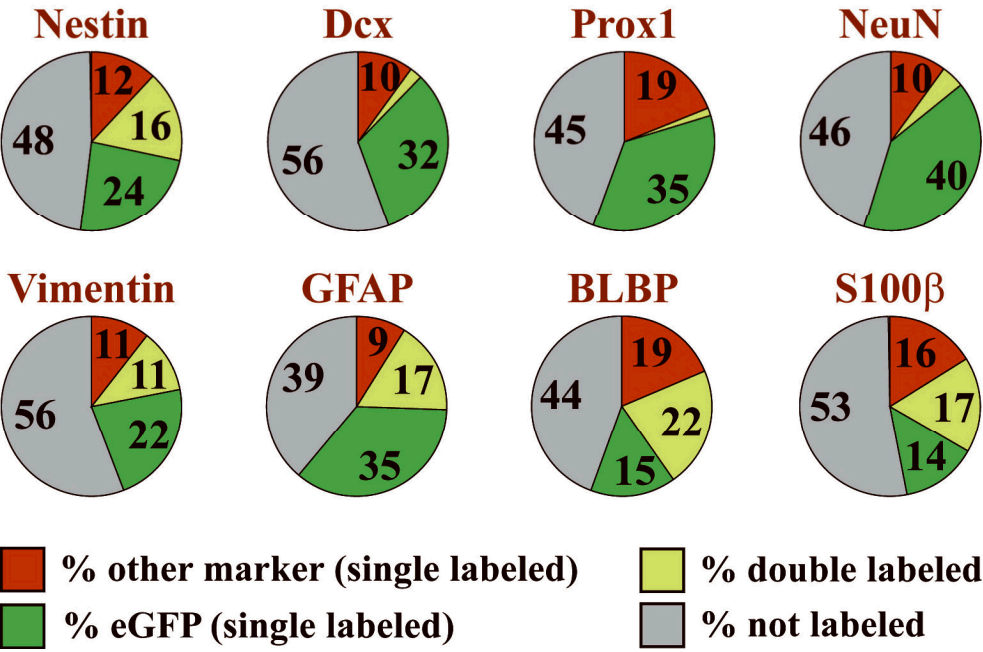

Type of file: figure

Label: Figure S7

Filename: BrunneS7.jpg

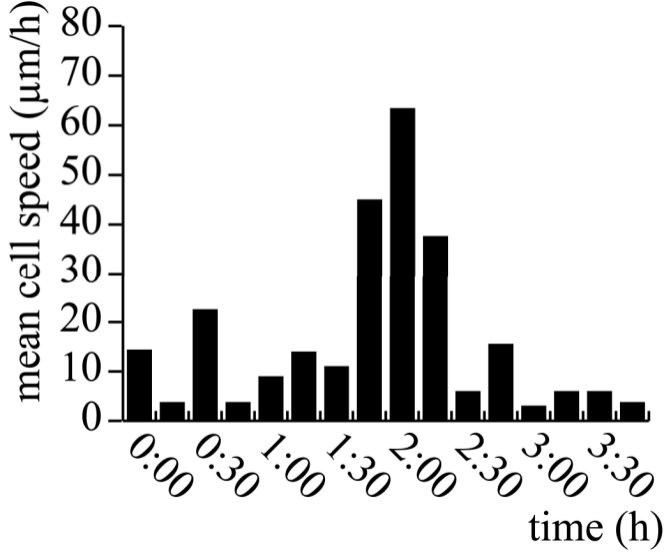

Type of file: figure

Label: Figure S8

Filename: BrunneS8.jpg

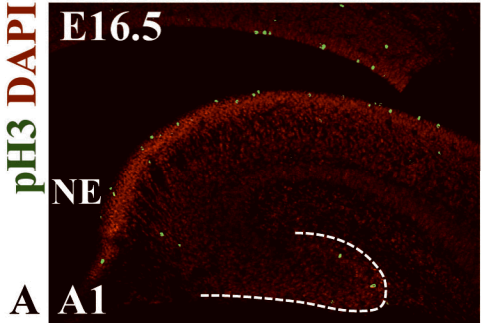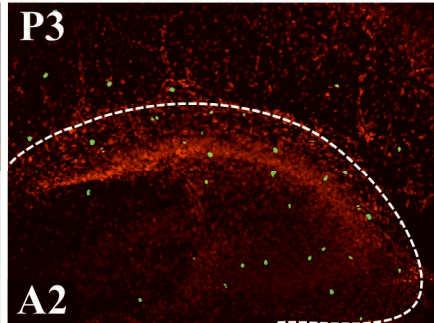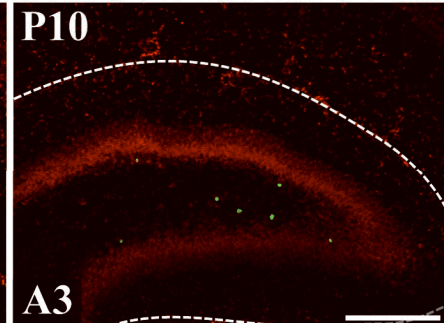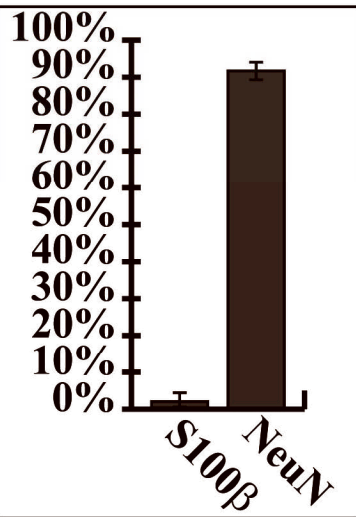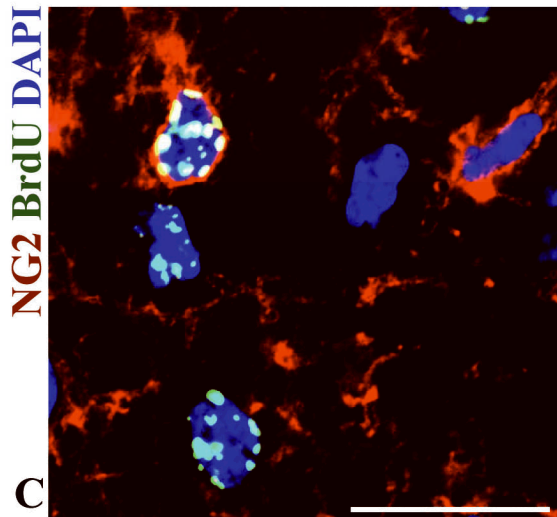

Supplement: NIHMS235998-supplement-2.pdf [file NIHMS235998-supplement-2.pdf]
